# Supplementary material for: Decoding Viewer Emotions in Video Ads: Predictive Insights through Deep Learning
Source: Research Square preprint supplement (doi:10.21203/rs.3.rs-3553507/v1), 2023-11-09
Supplement: Supplementary file 1 [file 222e6944ec8380659e1c89f9.pdf]

# Supplementary Material for Decoding Viewer Emotions in Video Ads: Predictive Insights through Deep Learning

Alexey Antonov<sup>2</sup>, Shravan Sampath Kumar<sup>4</sup>, William Headley<sup>4</sup>, Orlando Wood<sup>4</sup>,  
and Giovanni Montana<sup>1,2,3,\*</sup>

<sup>1</sup>Department of Statistics, University of Warwick

<sup>2</sup>WMG, University of Warwick

<sup>3</sup>Alan Turing Institute

<sup>4</sup>System1 Research

\*g.montana@warwick.ac.uk

| Rating | Videos | Anger | Contempt | Disgust | Fear | Happiness | Sadness | Surprise |
|--------|--------|-------|----------|---------|------|-----------|---------|----------|
| 1+     | 15,188 | 3.4%  | 6.9%     | 4.3%    | 3.8% | 0.9%      | 3.3%    | 2.4%     |
| 2+     | 9,762  | 1.1%  | 2.8%     | 1.3%    | 1.6% | 3.2%      | 1.0%    | 5.6%     |
| 3+     | 4,370  | 0.9%  | 1.5%     | 1.0%    | 1.3% | 14.1%     | 0.6%    | 7.7%     |
| 4+     | 1,126  | 1.2%  | 1.1%     | 0.9%    | 1.5% | 28.3%     | 0.7%    | 7.7%     |
| 5+     | 306    | 0.7%  | 0.0%     | 0.0%    | 3.6% | 49.0%     | 0.0%    | 7.2%     |

Table 1: Distribution of video ads in the Test Your Ad dataset by star rating. The columns report the percentage of videos containing at least one emotion jump for each rating category (e.g. 48.8% of 5+ star ads had a Happiness jump, while less than 1% of 1+ star ads had a Happiness jump).

| Percentile | Test Sample Size | Accuracy |
|------------|------------------|----------|
| 3%         | 13,098           | 36.5     |
| 2%         | 8,801            | 39.1     |
| 1%         | 4,702            | 40.9     |
| 0.5%       | 2,387            | 43.6     |
| 0.1%       | 473              | 42.7     |

Table 2: Test Your Ad data: test set size and average classification accuracy when using different cutoff percentiles of the emotional jump distribution to define positive examples for model training.

| Method                 | Type          | Modality         | Frames      | PreTrained     | Accuracy    |
|------------------------|---------------|------------------|-------------|----------------|-------------|
| TSM (2019, [5])        | 2D CNN        | RGB              | 8           | ImageNet       | 74.2        |
| TSAM                   | 2D CNN        | RGB              | 8           | ImageNet       | 73.3        |
| TSAM                   | 2D CNN        | RGB+audio        | 8+1         | ImageNet       | 75.8        |
| TSAM                   | 2D CNN        | RGB              | 8           | INet21K        | 75.8        |
| TSAM                   | 2D CNN        | RGB+audio        | 8+1         | INet21K        | 77.8        |
| TSM (2019, [5])        | 2D CNN        | RGB              | 16          | ImageNet       | 74.7        |
| TSAM                   | 2D CNN        | RGB              | 16          | ImageNet       | 73.8        |
| TSAM                   | 2D CNN        | RGB+audio        | 16+1        | ImageNet       | 76.4        |
| TSAM                   | 2D CNN        | RGB              | 16          | INet21K        | 76.3        |
| <b>TSAM</b>            | <b>2D CNN</b> | <b>RGB+audio</b> | <b>16+1</b> | <b>INet21K</b> | <b>78.1</b> |
| X3D-M(2020, [2])       | 3D CNN        | RGB              | 16          | -              | 76.0        |
| X3D-L(2020, [2])       | 3D CNN        | RGB              | 16          | -              | 78.2        |
| ViViT-L(2021, [1])     | Transformer   | RGB              | 16          | INet21K        | 80.6        |
| UniFormer-S(2022, [4]) | Transformer   | RGB              | 16          | ImageNet       | 80.8        |

Table 3: Comparison of TSAM performance on Kinetics-400 action recognition benchmark versus state-of-the-art 2D CNN models using RGB modality with 16 frames + 1 audio frame input. TSAM achieves state-of-the-art accuracy among 2D CNN architectures on this benchmark.

| Method                | Type          | Frames    | ShiftDepth | PreTrained         | Accuracy    |
|-----------------------|---------------|-----------|------------|--------------------|-------------|
| TSM (2019, [5])       | 2D CNN        | 8         | 1          | ImageNet           | 45.6        |
| TSM (2019, [5])       | 2D CNN        | 16        | 1          | ImageNet           | 47.2        |
| TSAM                  | 2D CNN        | 16        | 1          | INet21K            | 50.1        |
| TSAM                  | 2D CNN        | 16        | 2          | INet21K            | 50.4        |
| TSAM                  | 2D CNN        | 16        | 3          | INet21K            | 50.7        |
| TSAM                  | 2D CNN        | 16        | 4          | INet21K            | 51.1        |
| TSAM                  | 2D CNN        | 16        | 5          | INet21K            | 51.0        |
| <b>TSAM</b>           | <b>2D CNN</b> | <b>16</b> | <b>4</b>   | <b>Kinetics400</b> | <b>52.1</b> |
| CT-Net(2021, [3])     | 3D CNN        | 16        | -          | ImageNet           | 52.5        |
| UniFormer-S(2022,[4]) | Transformer   | 16        | -          | Kinetics400        | 53.8        |

Table 4: Performance comparison of TSAM versus state-of-the-art 2D CNN models on the Something-Something V1 benchmark using 16 frame RGB input. TSAM achieves state-of-the-art accuracy among 2D CNN architectures.

## References

- [1] Anurag Arnab, Mostafa Dehghani, Georg Heigold, Chen Sun, Mario Lucic, and Cordelia Schmid. Vivit: A video vision transformer. *CoRR*, abs/2103.15691, 2021.
- [2] Christoph Feichtenhofer. X3D: expanding architectures for efficient video recognition. *CoRR*, abs/2004.04730, 2020.
- [3] Kunchang Li, Xianhang Li, Yali Wang, Jun Wang, and Yu Qiao. Ct-net: Channel tensorization network for video classification. *CoRR*, abs/2106.01603, 2021.
- [4] Kunchang Li, Yali Wang, Gao Peng, Guanglu Song, Yu Liu, Hongsheng Li, and Yu Qiao. Uniformer: Unified transformer for efficient spatial-temporal representation learning. In *International Conference on Learning Representations*, 2022.
- [5] Ji Lin, Chuang Gan, and Song Han. TSM: Temporal shift module for efficient video understanding. In *Proceedings of the IEEE International Conference on Computer Vision*, volume 2019-October, 2019.
